# Supplementary material for: Uncovering the role of TET2-mediated ENPEP activation in trophoblast cell fate determination
Source: PubMed Central journal article supplement (PMC11335190; doi:10.1007/s00018-024-05306-z), 2024-06-17
Supplement: 18_2024_5306_MOESM6_ESM.pdf [file 18_2024_5306_MOESM6_ESM.pdf]

## Supplementary information

**Table S1. PCR primers**

| Gene         | Location | Primer sequences                                                         | T <sub>m</sub> (°C) |
|--------------|----------|--------------------------------------------------------------------------|---------------------|
| <i>ENPEP</i> | Exon 2   | Forward: CAGCTGTTCACTTCCCATAA<br>Reverse: CACTTCCCCTCACCAAAG             | 59.1                |
|              | Exon 10  | Forward: GGACCAGACAGATGGGTTATC<br>Reverse: CAGCCTCACTTCTCACTCTTAC        | 59.1                |
|              | Promoter | Forward: TTTAGGTTGAGTGGTAAAGGTTGAG<br>Reverse: TACAAAAAATTATCACAACCTCCCC | 58.3                |
| <i>TET2</i>  | Exon 3   | Forward: TGGAGAAAGACGTAACCTTCG<br>Reverse: TGGAGAAAGACGTAACCTTCG         | 55.8                |
|              | Exon 6   | Forward: GTCCATTCTAGTGCCTGCTAAA<br>Reverse: AGACACTCTGACTGCTCCTAA        | 55.8                |

**Table S2. Antibodies**

| Antibody     | Catalog number                  | Host   | Application | Concentration/Dilution |
|--------------|---------------------------------|--------|-------------|------------------------|
| Anti-TET1    | GTX124207 (GeneTex)             | Rabbit | ChIP        | 1.05 mg/mL             |
| Anti-TET2    | A304-247A (Bethyl Laboratories) | Rabbit | ChIP, ICC   | 1 mg/mL, 1:200         |
| Anti-TET3    | GTX121453 (GeneTex)             | Rabbit | ChIP        | 1 mg/mL                |
| Anti-ENPEP   | MA1028 (Invitrogen)             | Mouse  | WB          | 1:1000                 |
| Anti-β-actin | A5316 (Sigma- Aldrich)          | Mouse  | WB          | 1:10000                |
| Anti-ENPEP   | MA5-25787(Invitrogen)           | Mouse  | ICC         | 1:100                  |

**Table S3. TaqMan qPCR Primers**

| Gene symbols           | Assay ID      |
|------------------------|---------------|
| <i>POU5F1(OCT4)</i>    | Hs00999632_g1 |
| <i>GATA2</i>           | Hs00231119_m1 |
| <i>GATA3</i>           | Hs00231122_m1 |
| <i>KRT7</i>            | Hs00559840_m  |
| <i>TFAP2C</i>          | Hs00231476_m1 |
| <i>CGB3</i>            | Hs00361224_gH |
| <i>ERVW-1</i>          | Hs00205893_m1 |
| <i>SDC1</i>            | Hs04966523_m1 |
| <i>GCM1</i>            | Hs00172692_m1 |
| <i>HLA-G</i>           | Hs00365950_g1 |
| <i>MMP2</i>            | Hs01548727_m1 |
| <i>ENPEP</i>           | Hs00989749_m1 |
| <i>DNMT1</i>           | Hs00945875_m1 |
| <i>DNMT3A</i>          | Hs01027162_m1 |
| <i>DNMT3B</i>          | Hs00171876_m1 |
| <i>DNMT3L</i>          | Hs01081364_m1 |
| <i>TET1</i>            | Hs04189344_g1 |
| <i>TET2</i>            | Hs00325999_m1 |
| <i>TET3</i>            | Hs00896441_m1 |
| <i>has-miR-103</i>     | 000439        |
| <i>hsa-miR-525b-3p</i> | 002385        |
| <i>has-miR-517a</i>    | 002402        |
| <i>has-miR-517</i>     | 001113        |

**Table S4. Primer sequences for ChIP-qPCR**

| Primer  | Sequences                                                        |
|---------|------------------------------------------------------------------|
| ENPEP-1 | Forward: CACCCAATTCCAGGATATGAC<br>Reverse: GCAATCTCTCCCTCCTAACTA |

ENPEP-2 Forward: GGGTGGAGATGCGTCGTTTA  
Reverse: GCTTCTTGCGCCTTTCCTC  
ENPEP-3 Forward: CCTCCCGTTGGCTGATA  
Reverse: GGAATGAGGACTCCGTAAGA

---
